# Supplementary material for: A new model of decision processing in instrumental learning tasks
Source: eLife journal article supplement (doi:10.7554/elife.63055), 2021-01-27
Supplement: supp [file elife-63055-supp-v1.zip]

Archive with 22 entries (22 files):
- elife_poa_e63055_Transparent_Reporting_File.docx
- elife_poa_e63055_Figure_3_figure_supplement_1.pdf
- elife_poa_e63055_Figure_3_figure_supplement_2.pdf
- elife_poa_e63055_Figure_3_figure_supplement_3.pdf
- elife_poa_e63055_Figure_3_figure_supplement_4.pdf
- elife_poa_e63055_Figure_4_figure_supplement_1.pdf
- elife_poa_e63055_Figure_4_figure_supplement_2.pdf
- elife_poa_e63055_Figure_4_figure_supplement_3.pdf
- elife_poa_e63055_Figure_4_figure_supplement_4.pdf
- elife_poa_e63055_Figure_6_figure_supplement_1.pdf
- elife_poa_e63055_Figure_6_figure_supplement_2.pdf
- elife_poa_e63055_Figure_6_figure_supplement_3.pdf
- elife_poa_e63055_Figure_6_figure_supplement_4.pdf
- elife_poa_e63055_Figure_6_figure_supplement_5.pdf
- elife_poa_e63055_Figure_7_figure_supplement_1.pdf
- elife_poa_e63055_Figure_7_figure_supplement_2.pdf
- elife_poa_e63055_Figure_7_figure_supplement_3.pdf
- elife_poa_e63055_Figure_7_figure_supplement_4.pdf
- elife_poa_e63055_Figure_7_figure_supplement_5.pdf
- elife_poa_e63055_Figure_11_figure_supplement_1.pdf
- elife_poa_e63055_Figure_11_figure_supplement_2.pdf
- elife_poa_e63055_Figure_11_figure_supplement_3.pdf
