# Supplementary material for: A new model of decision processing in instrumental learning tasks
Source: eLife journal article supplement (doi:10.7554/elife.63055), 2021-01-27

Median posterior

 $a$ 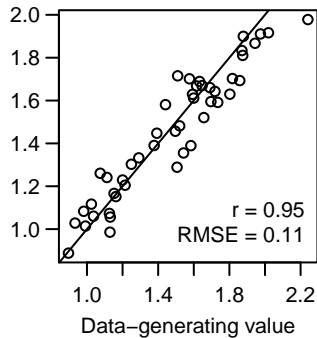 $V_0$ 

Median posterior

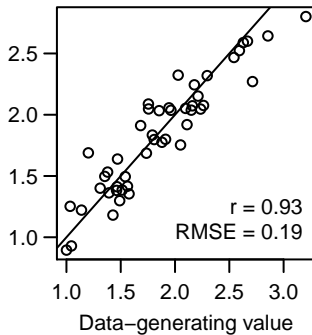 $w_D$ 

Median posterior

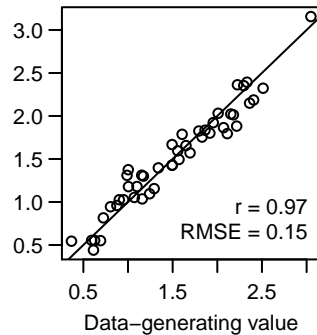 $w_S$ 

Median posterior

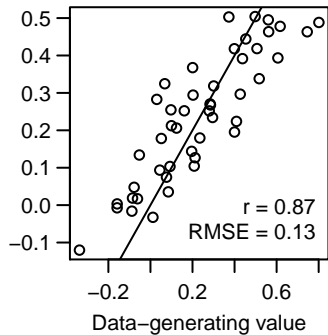 $\alpha$ 

Median posterior

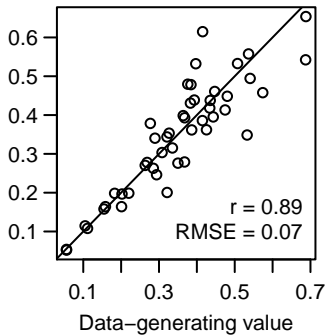 $t_0$ 

Median posterior

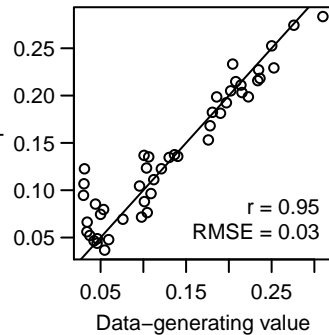

Supplement: supp [file elife-63055-supp-v1.zip › elife_poa_e63055_Figure_6_figure_supplement_2.pdf]
