# Supplementary figures and images for: A new model of decision processing in instrumental learning tasks
Source: eLife journal article supplement (doi:10.7554/elife.63055), 2021-01-27

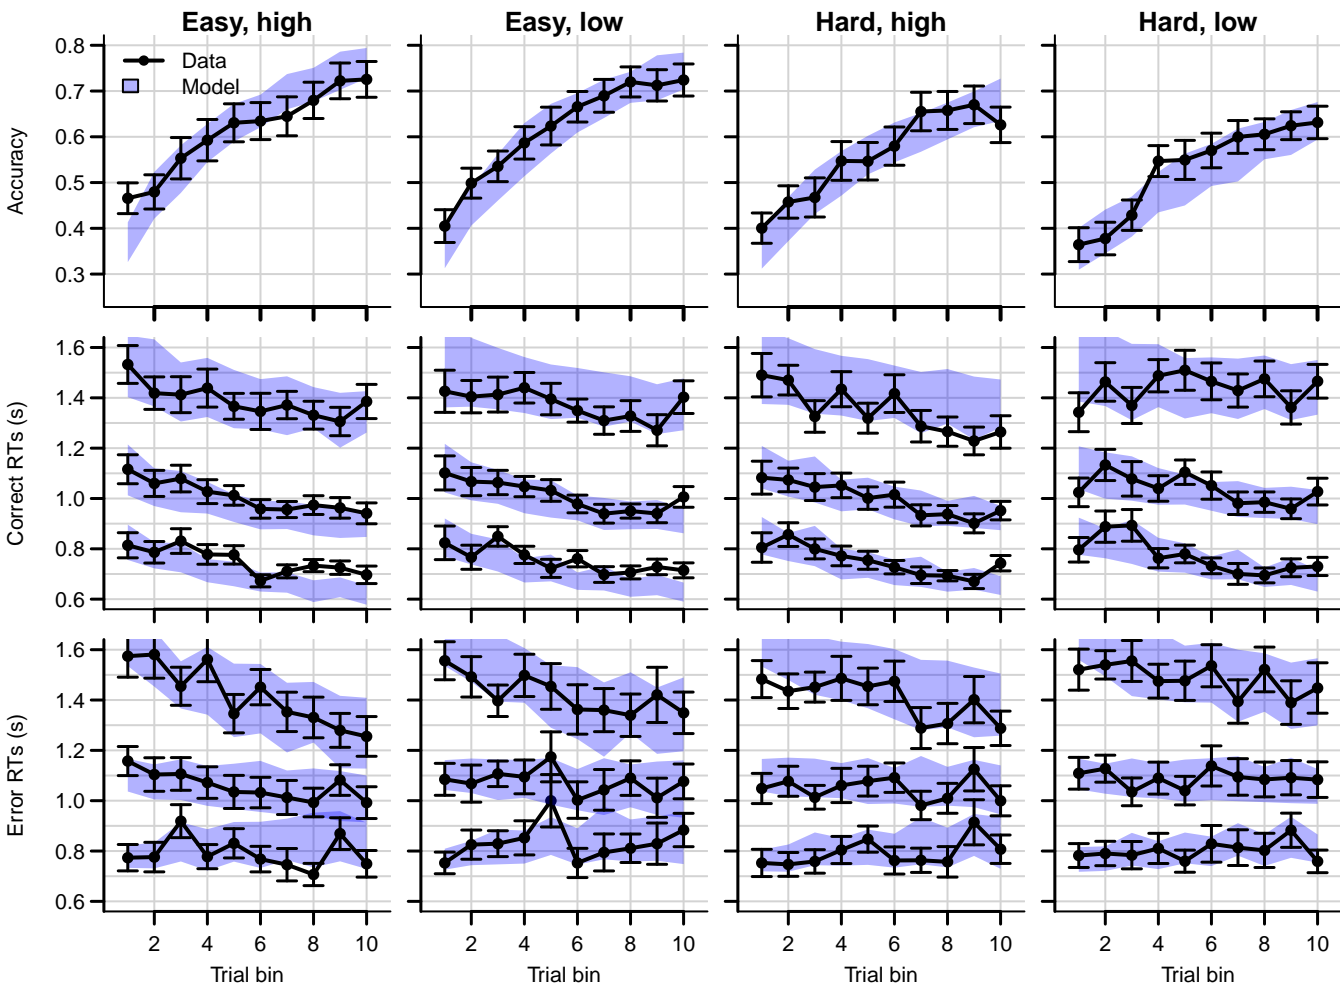

Supplement: supp [file elife-63055-supp-v1.zip]

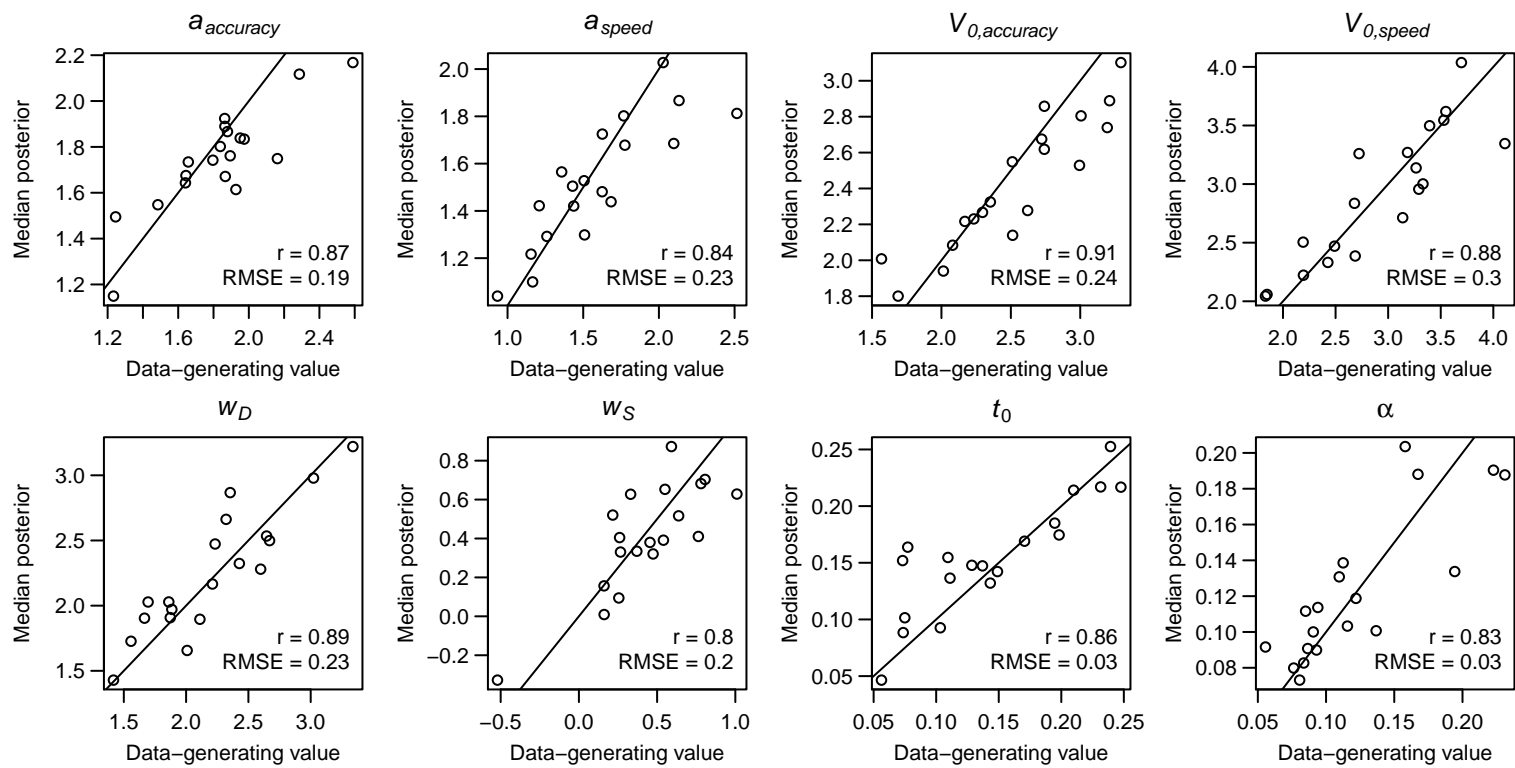

Supplement: supp [file elife-63055-supp-v1.zip]

## RL-DDM

BPIC = 978

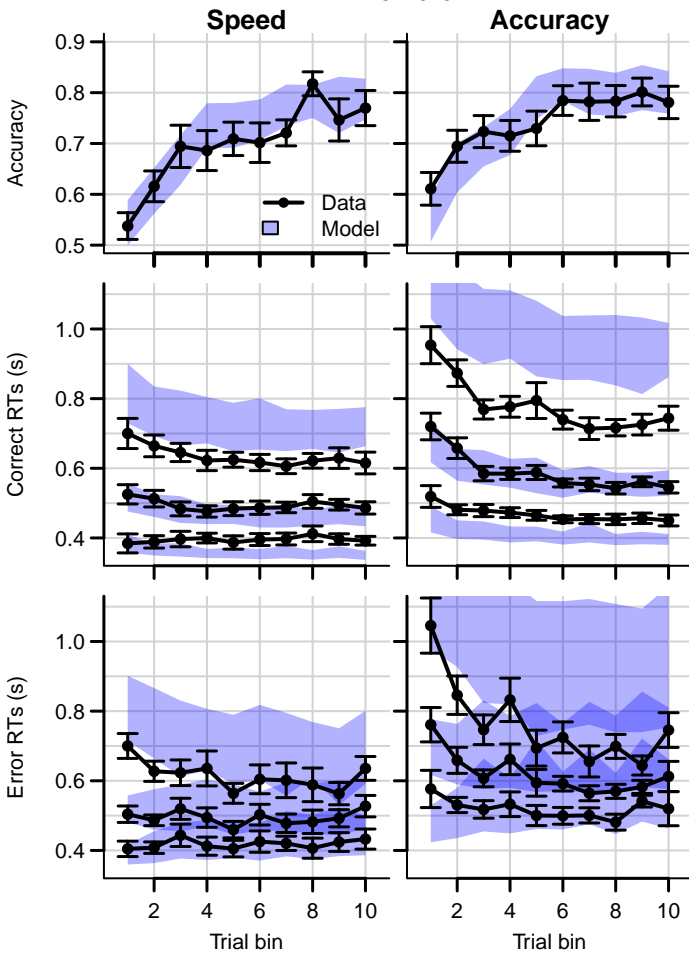

## RL-ARD

BPIC = -1071

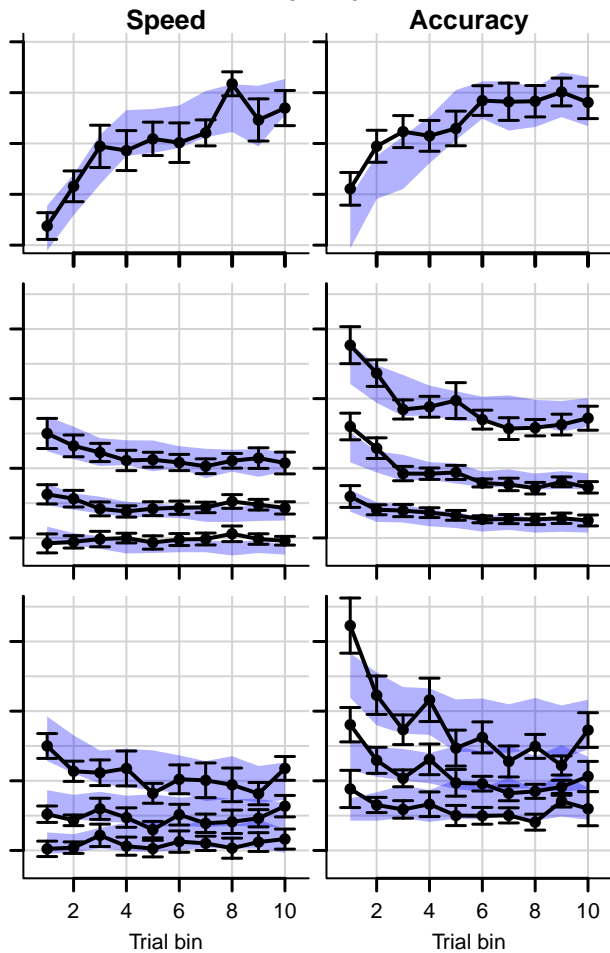

Supplement: supp [file elife-63055-supp-v1.zip]

**RL-DDM**  
BPIC = 15599

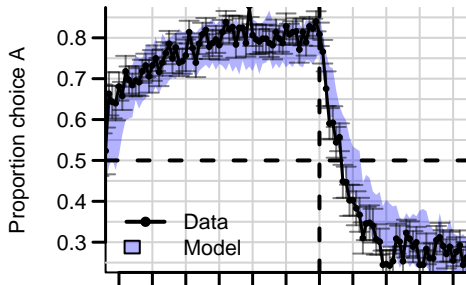

**RL-ARD**  
BPIC = 11548

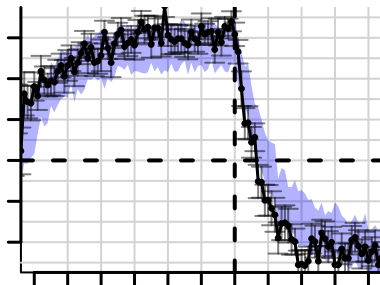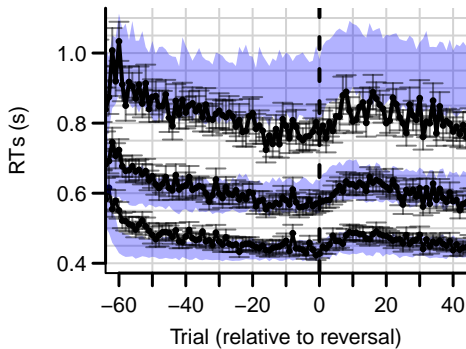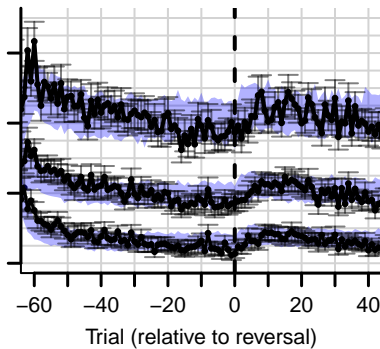

Supplement: supp [file elife-63055-supp-v1.zip]

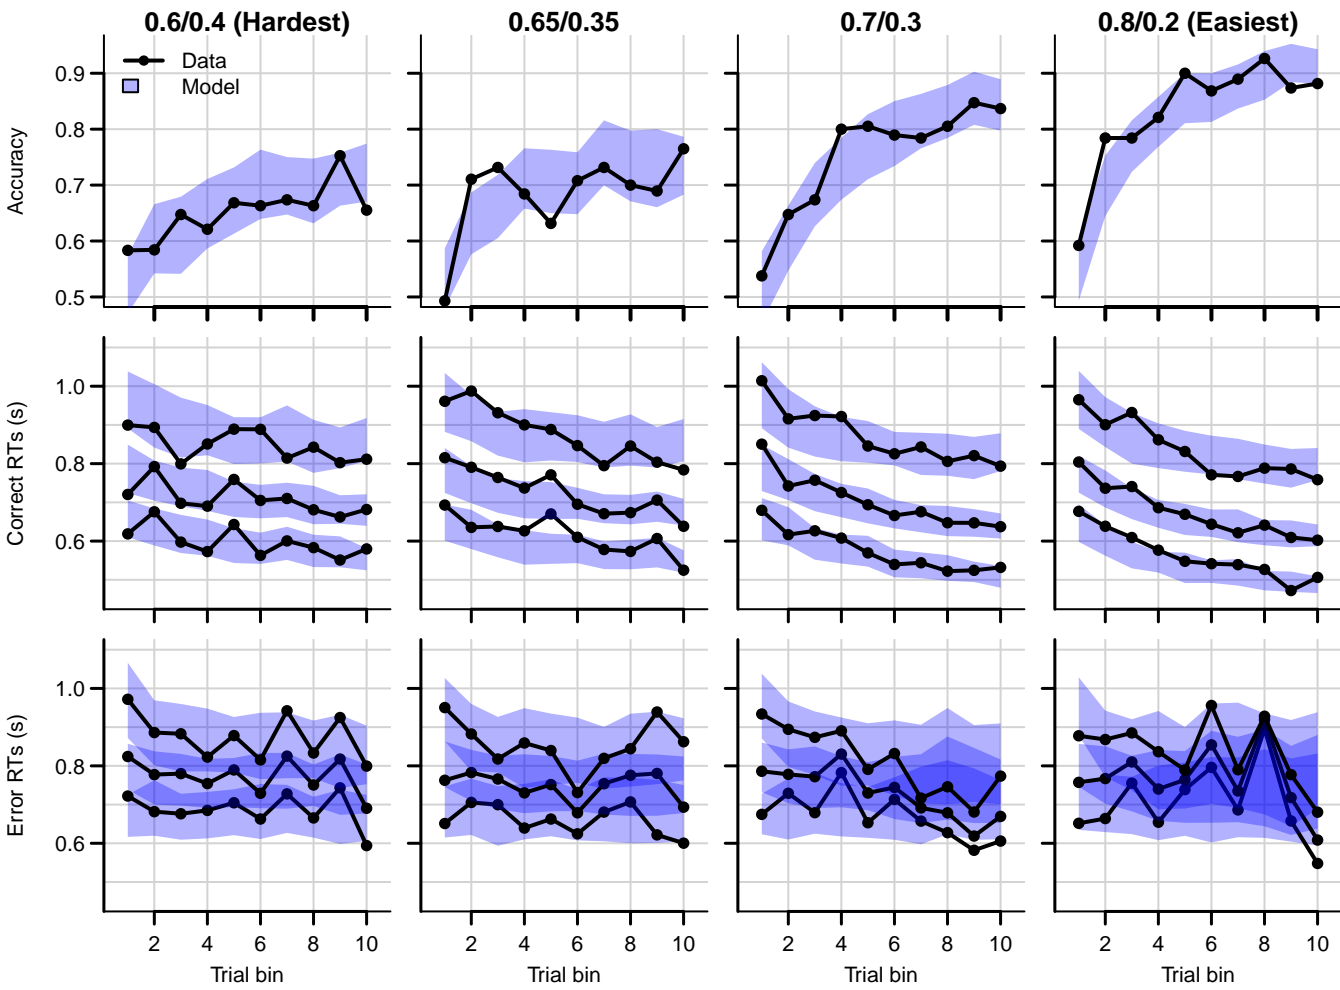

Supplement: supp [file elife-63055-supp-v1.zip]

BPIC

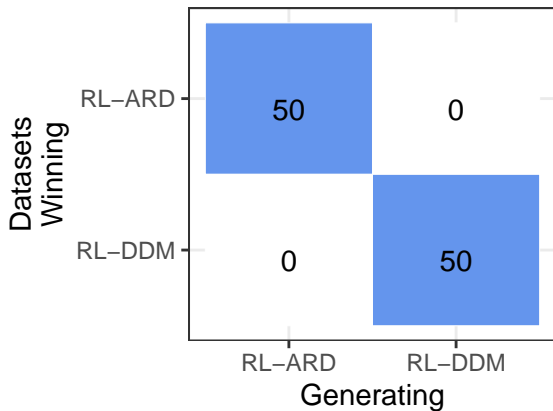

Minimum deviance

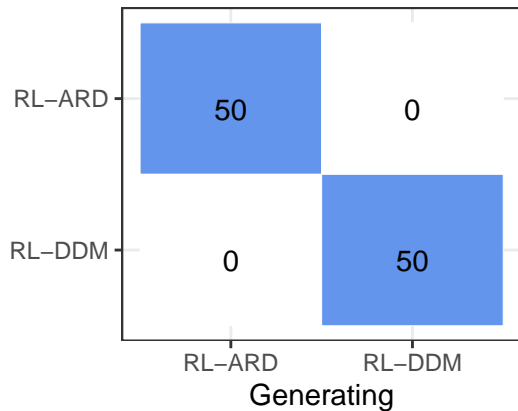

Subjects Winning

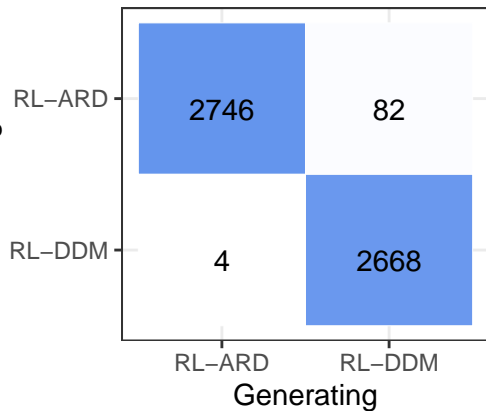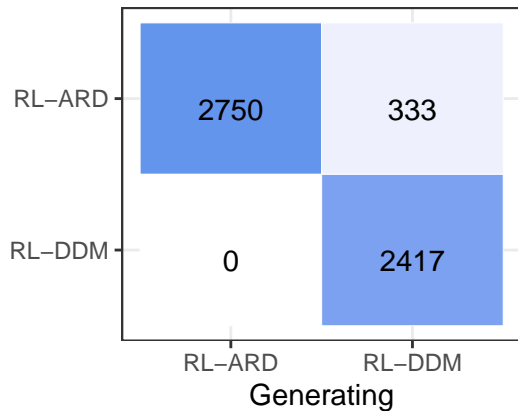

Supplement: supp [file elife-63055-supp-v1.zip]

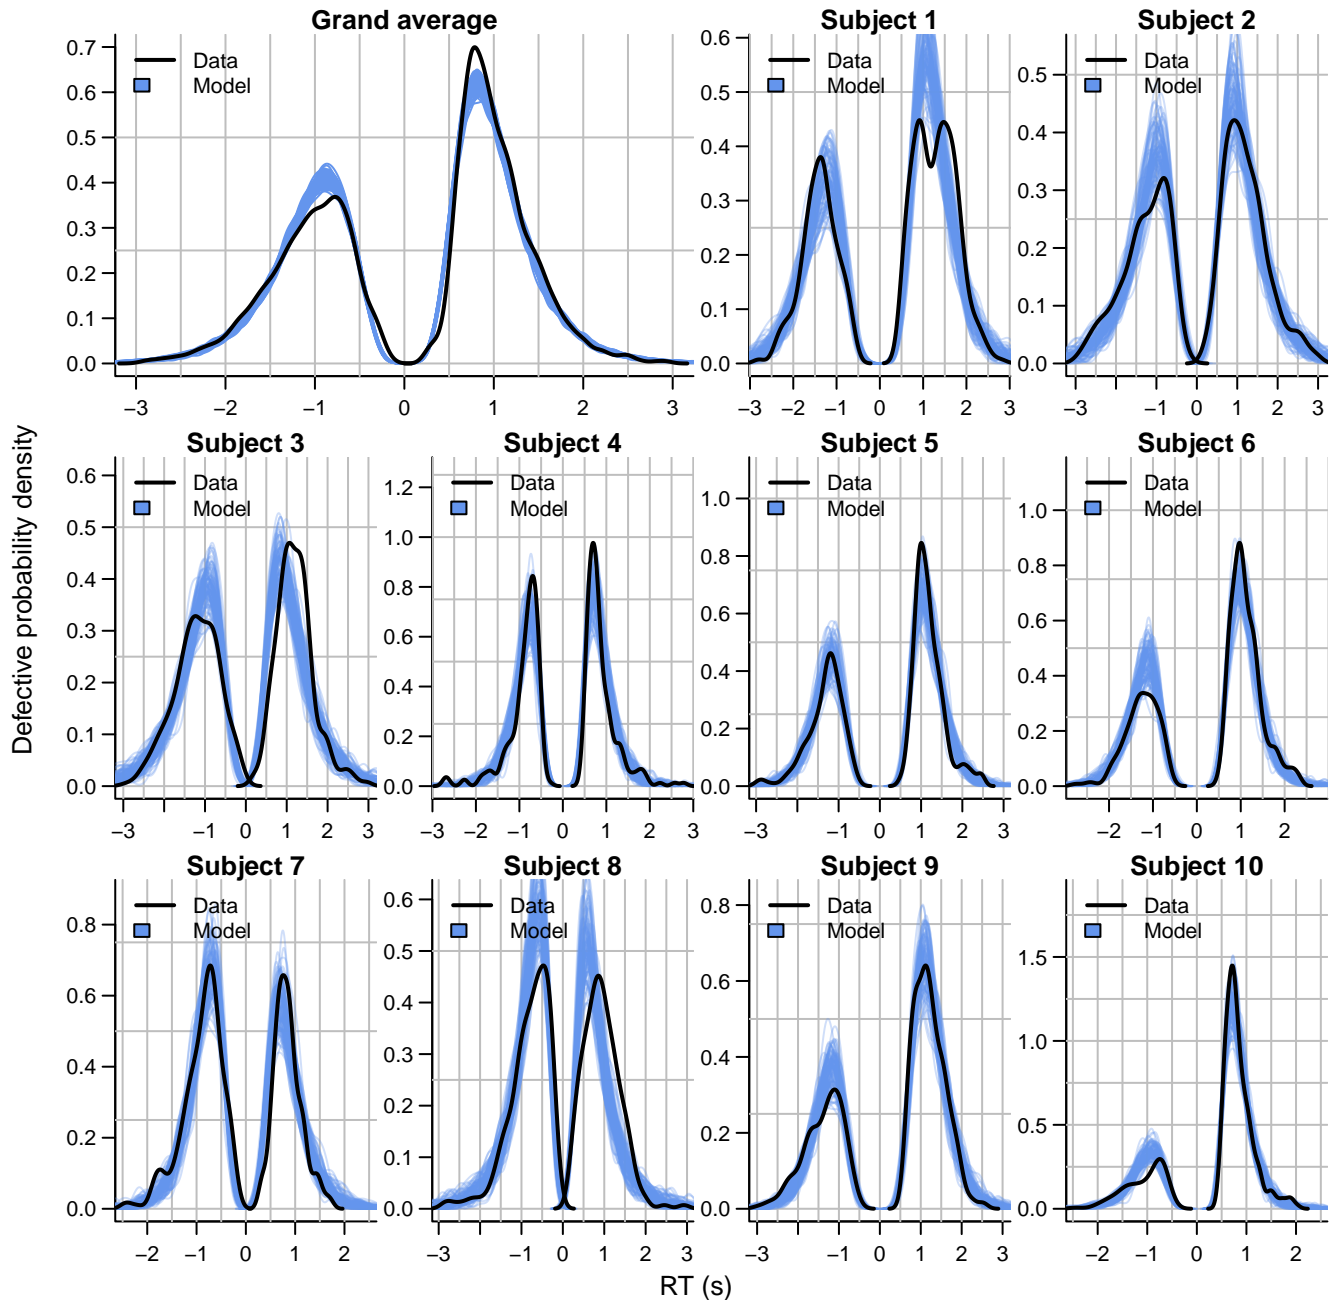

Supplement: supp [file elife-63055-supp-v1.zip]

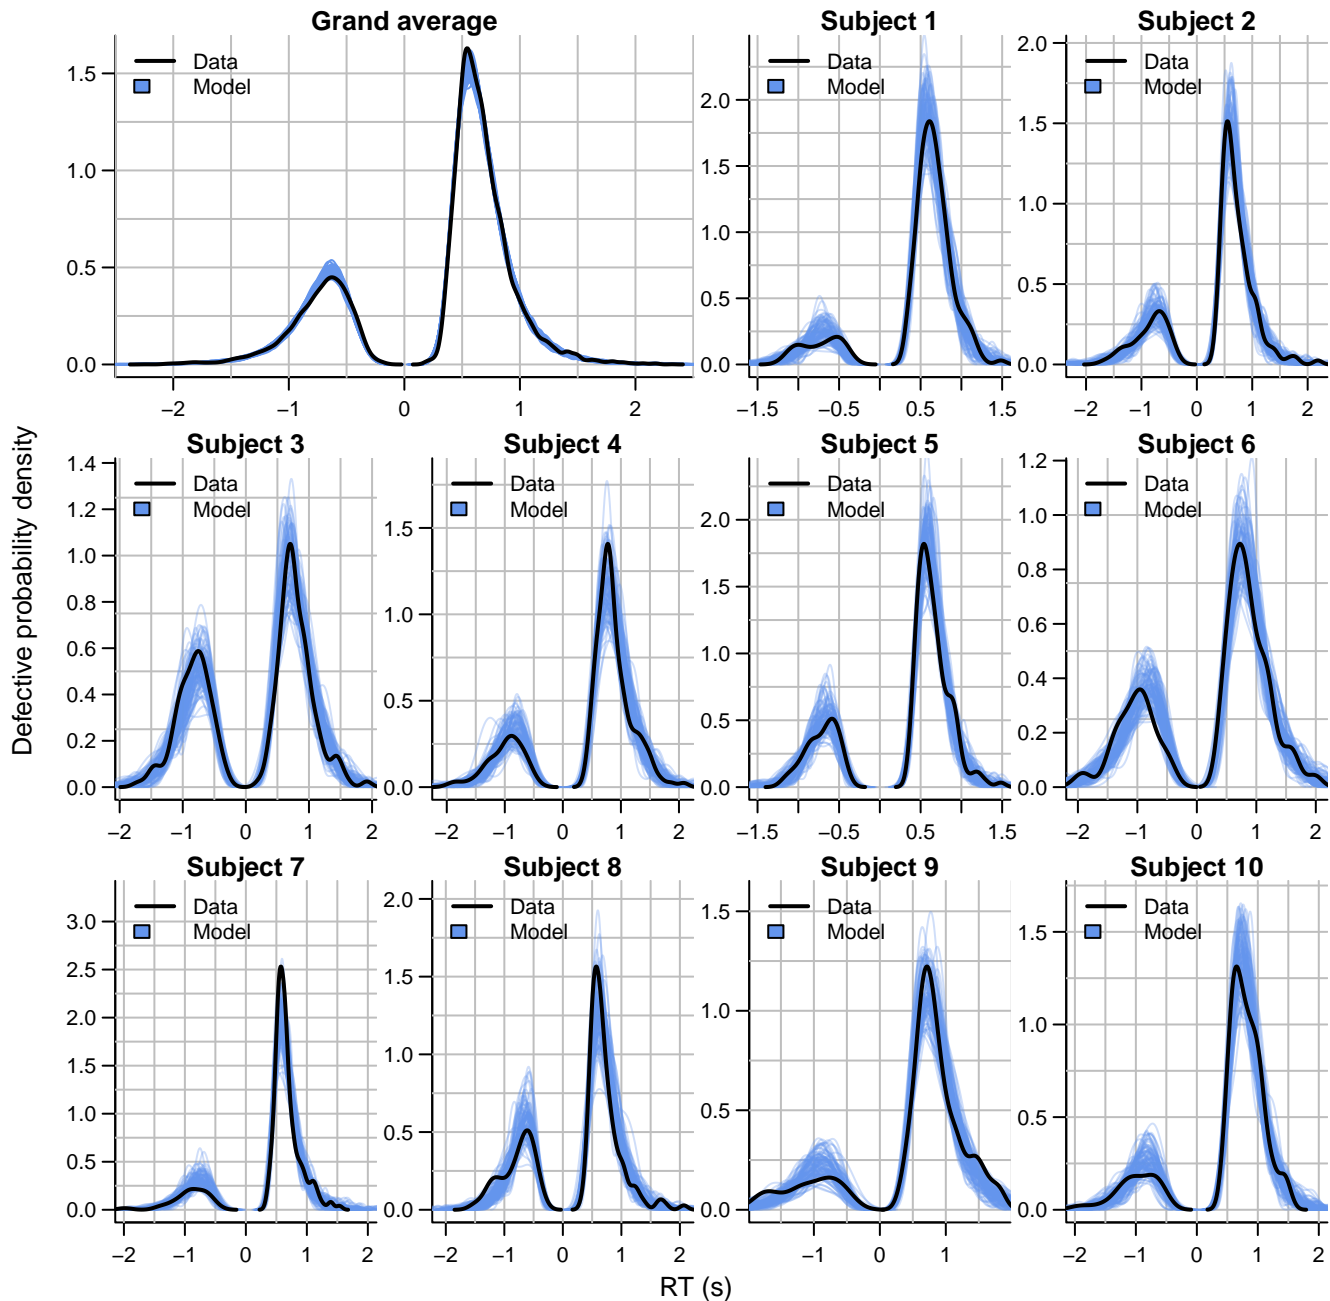

Supplement: supp [file elife-63055-supp-v1.zip]

### Experiment 2

Mean RT (s)

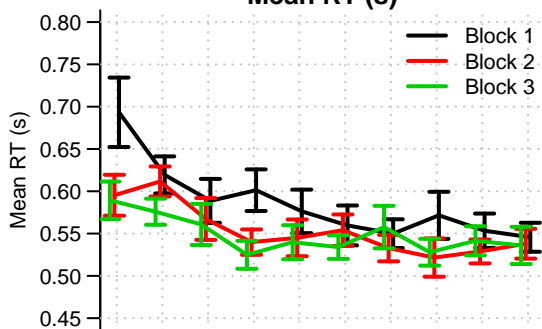

Accuracy

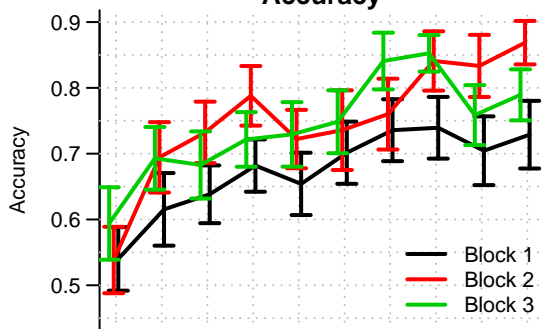

### Experiment 3

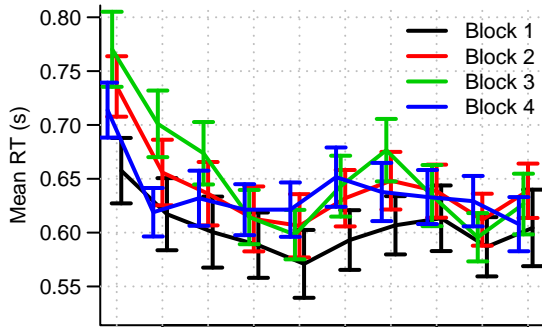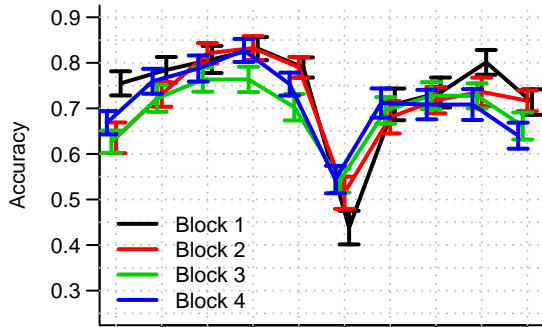

### Experiment 4

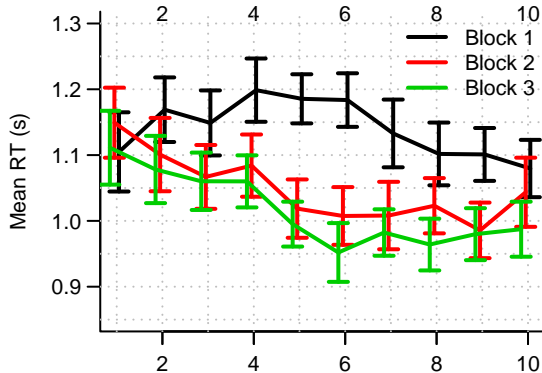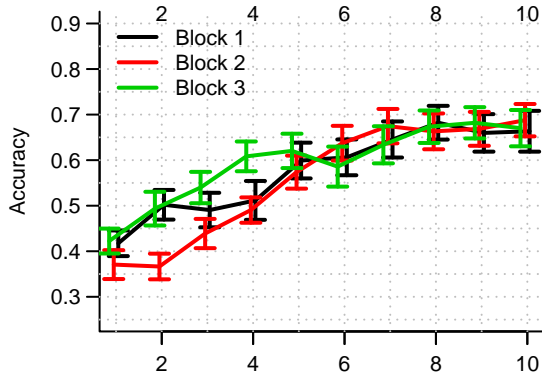

Supplement: supp [file elife-63055-supp-v1.zip]

$a$ 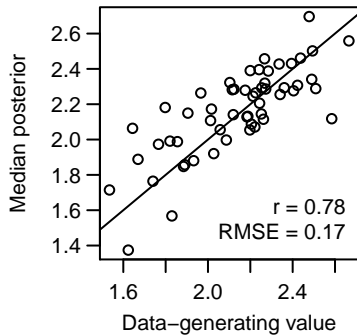 $V_0$ 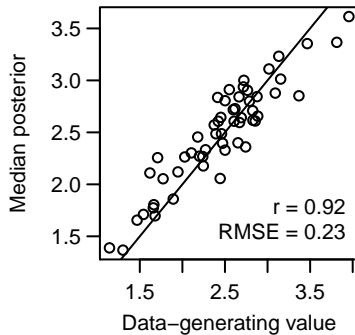 $w_D$ 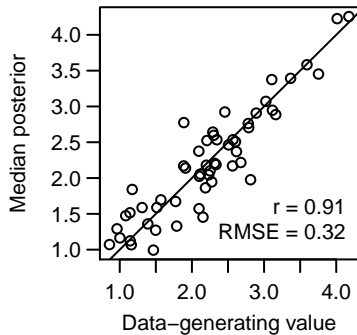 $w_S$ 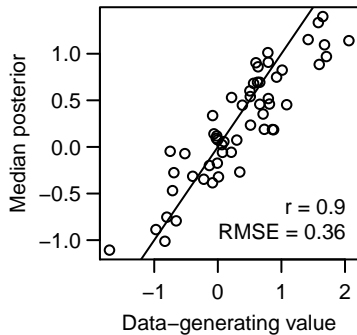 $\alpha$ 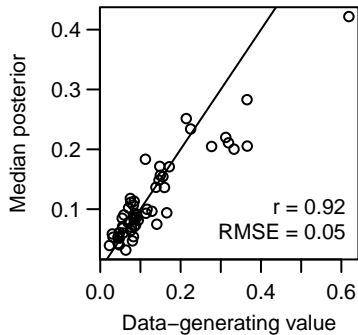 $t_0$ 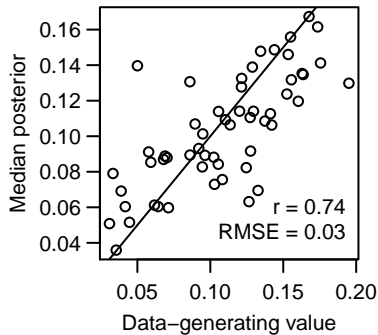

Supplement: supp [file elife-63055-supp-v1.zip]

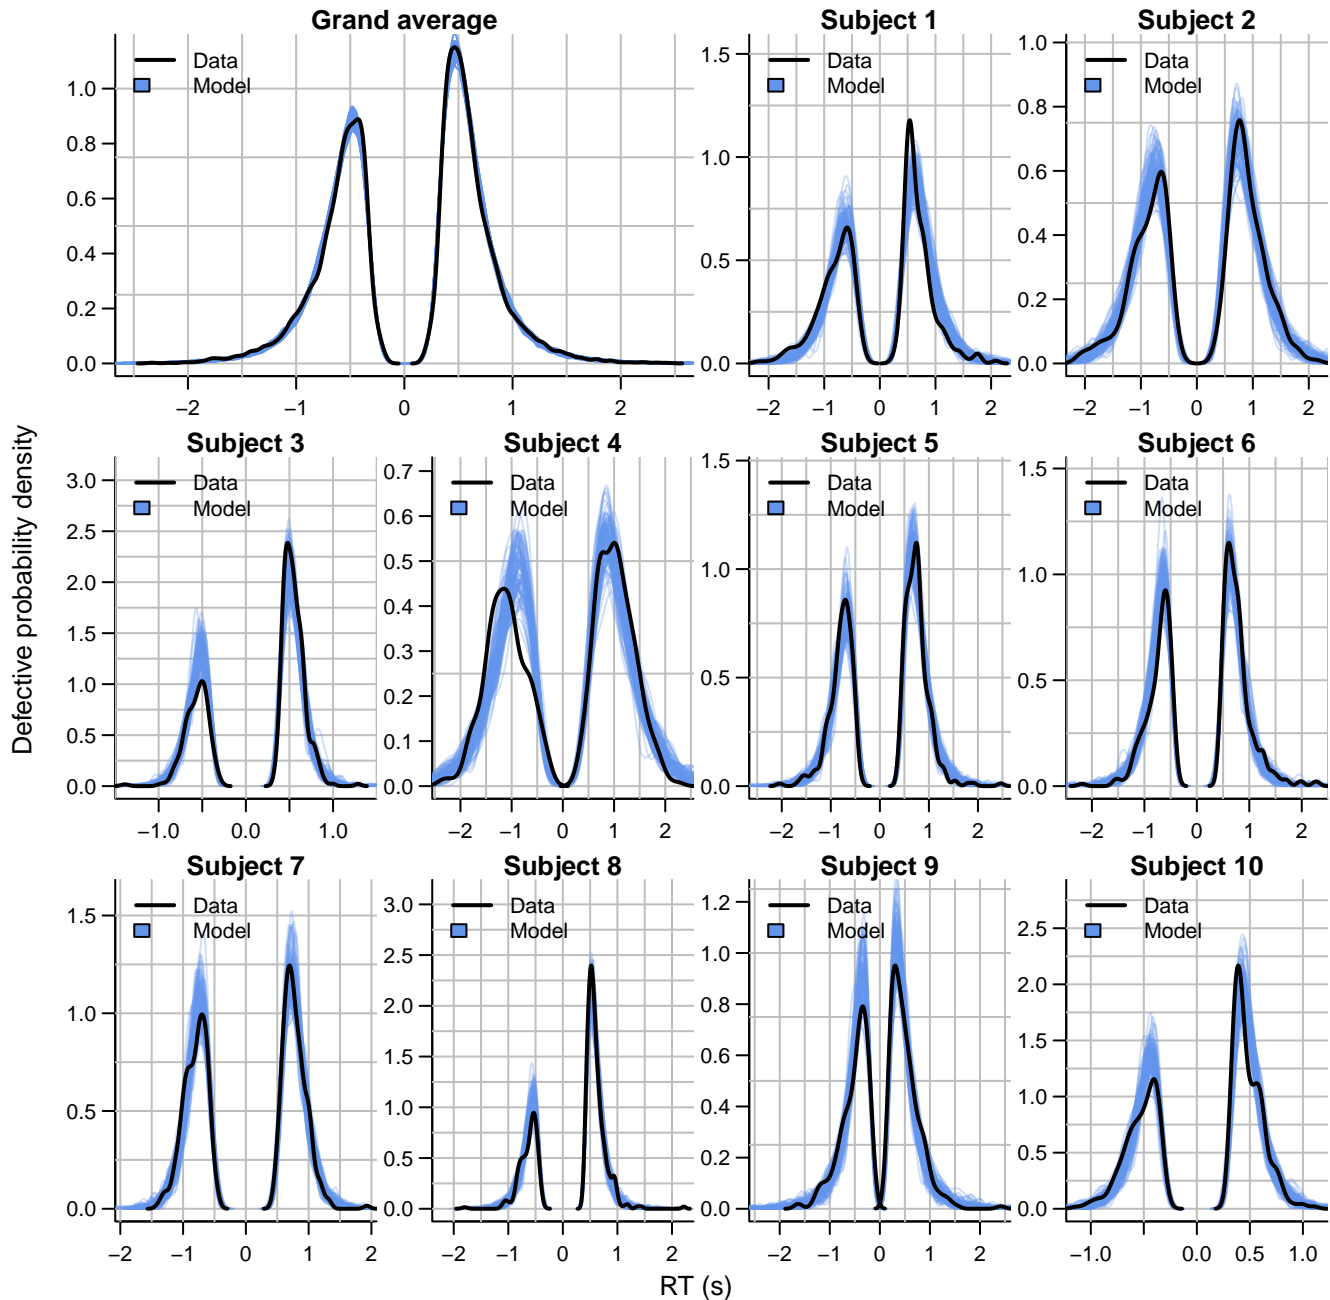

Supplement: supp [file elife-63055-supp-v1.zip]

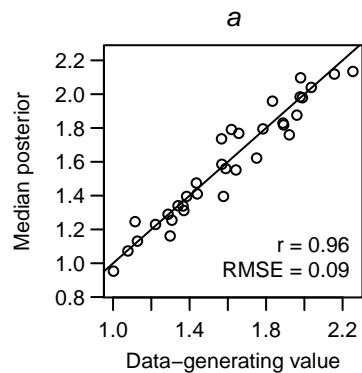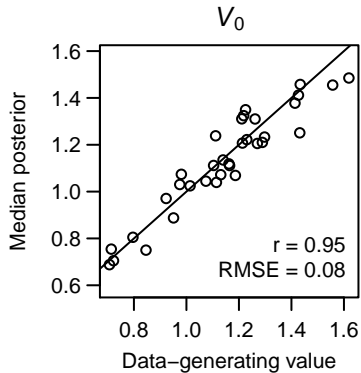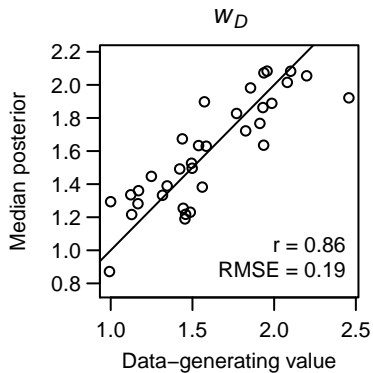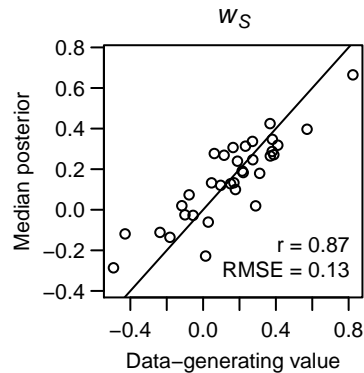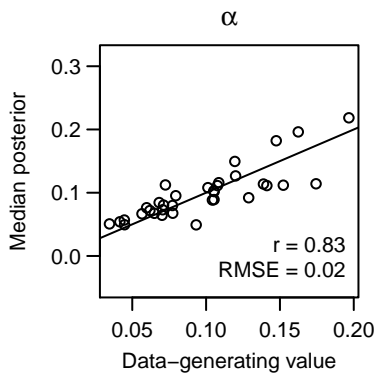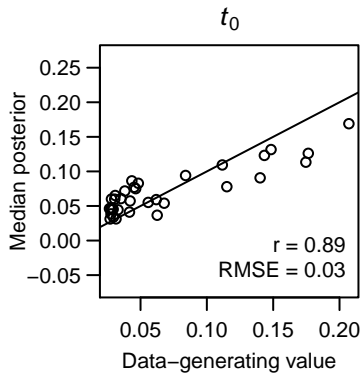

Supplement: supp [file elife-63055-supp-v1.zip]

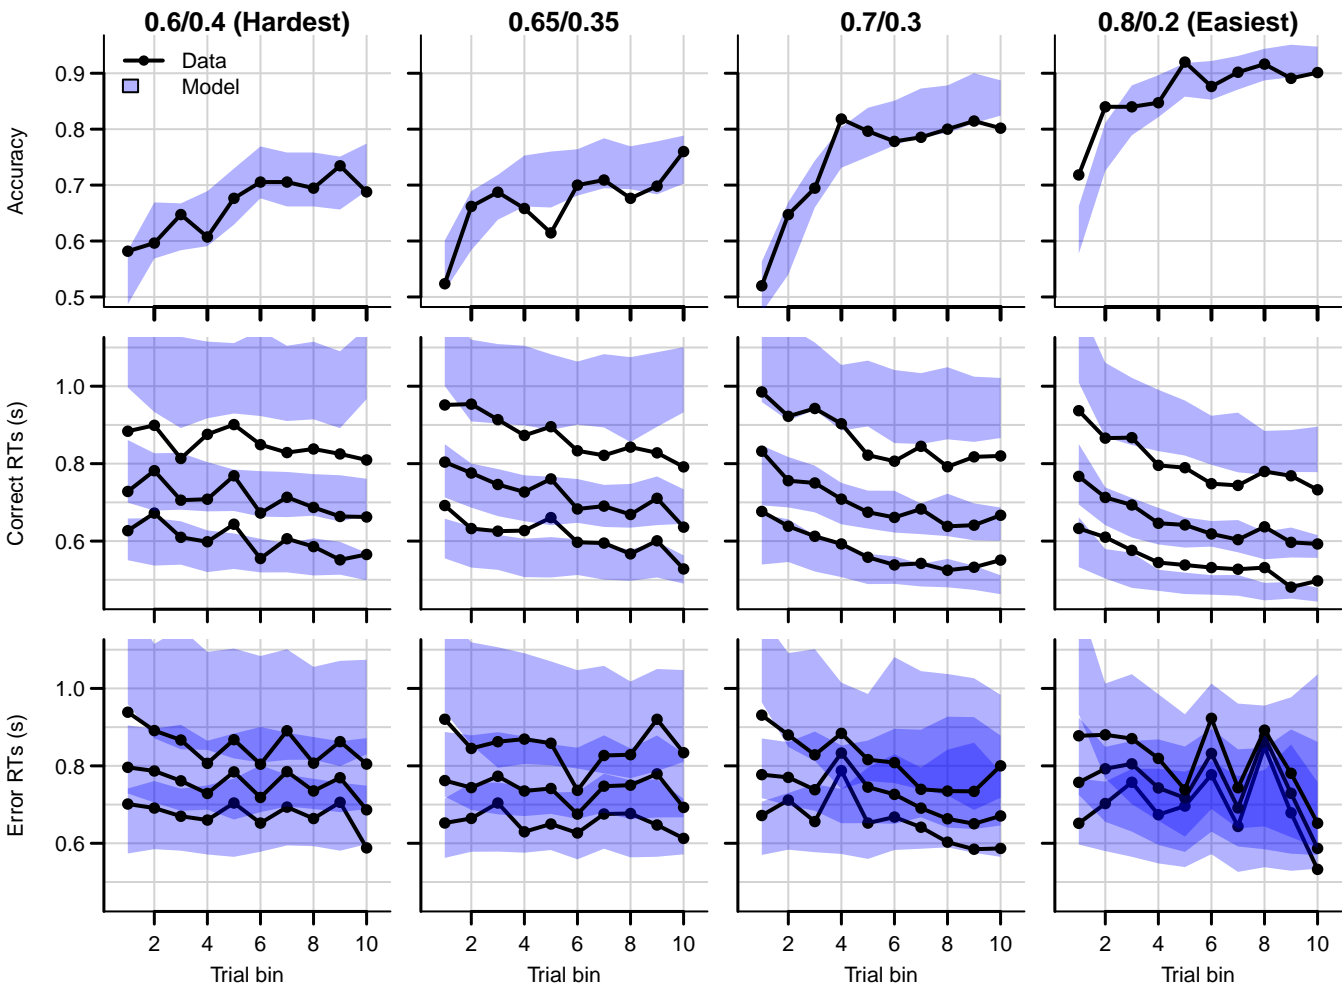

Supplement: supp [file elife-63055-supp-v1.zip]

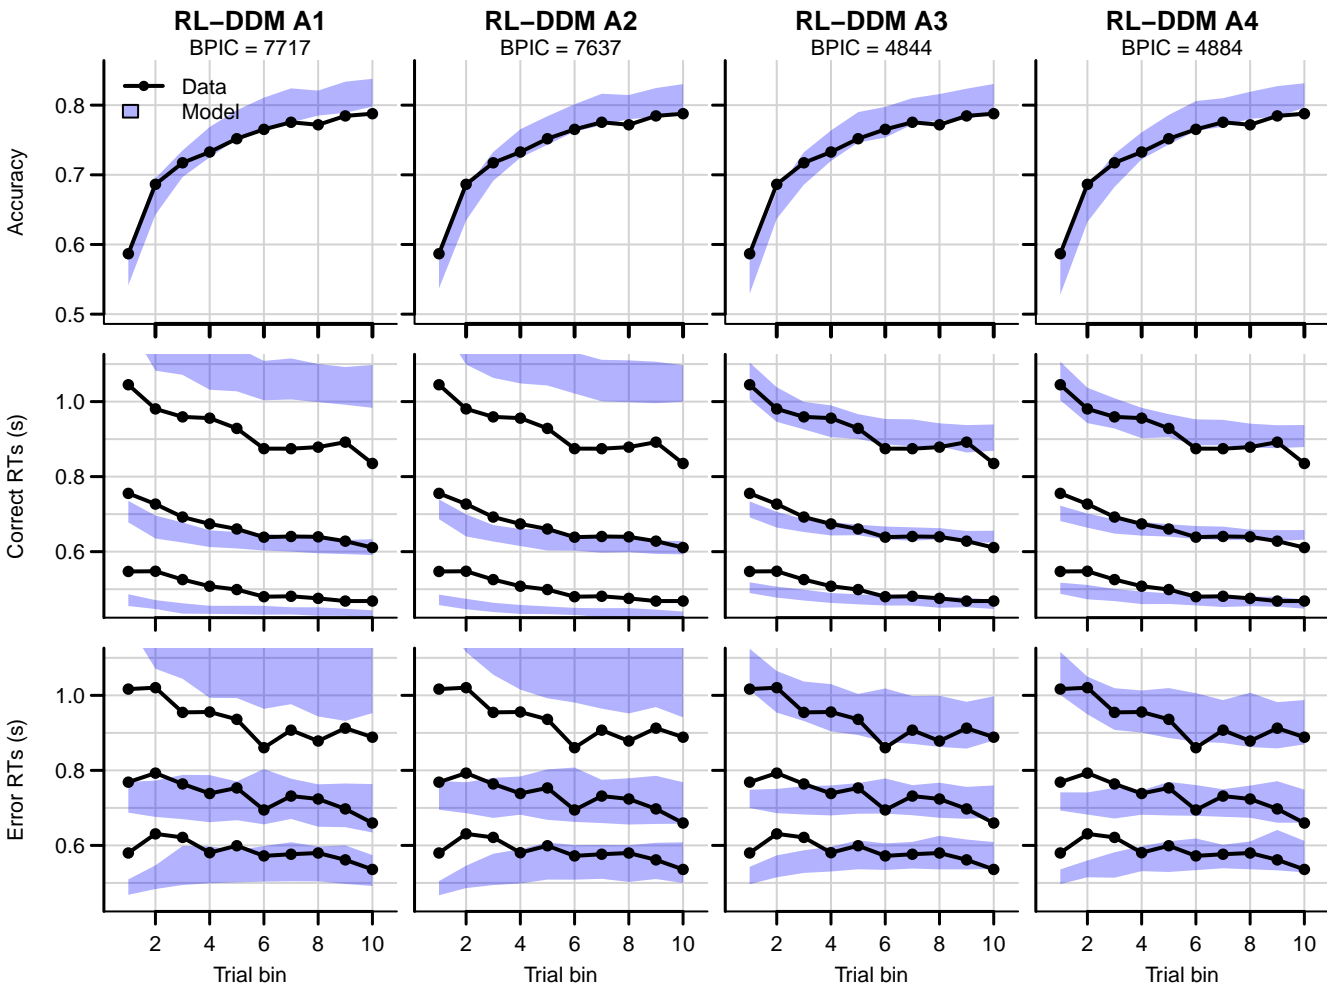

Supplement: supp [file elife-63055-supp-v1.zip › elife_poa_e63055_Figure_3_figure_supplement_1.pdf]

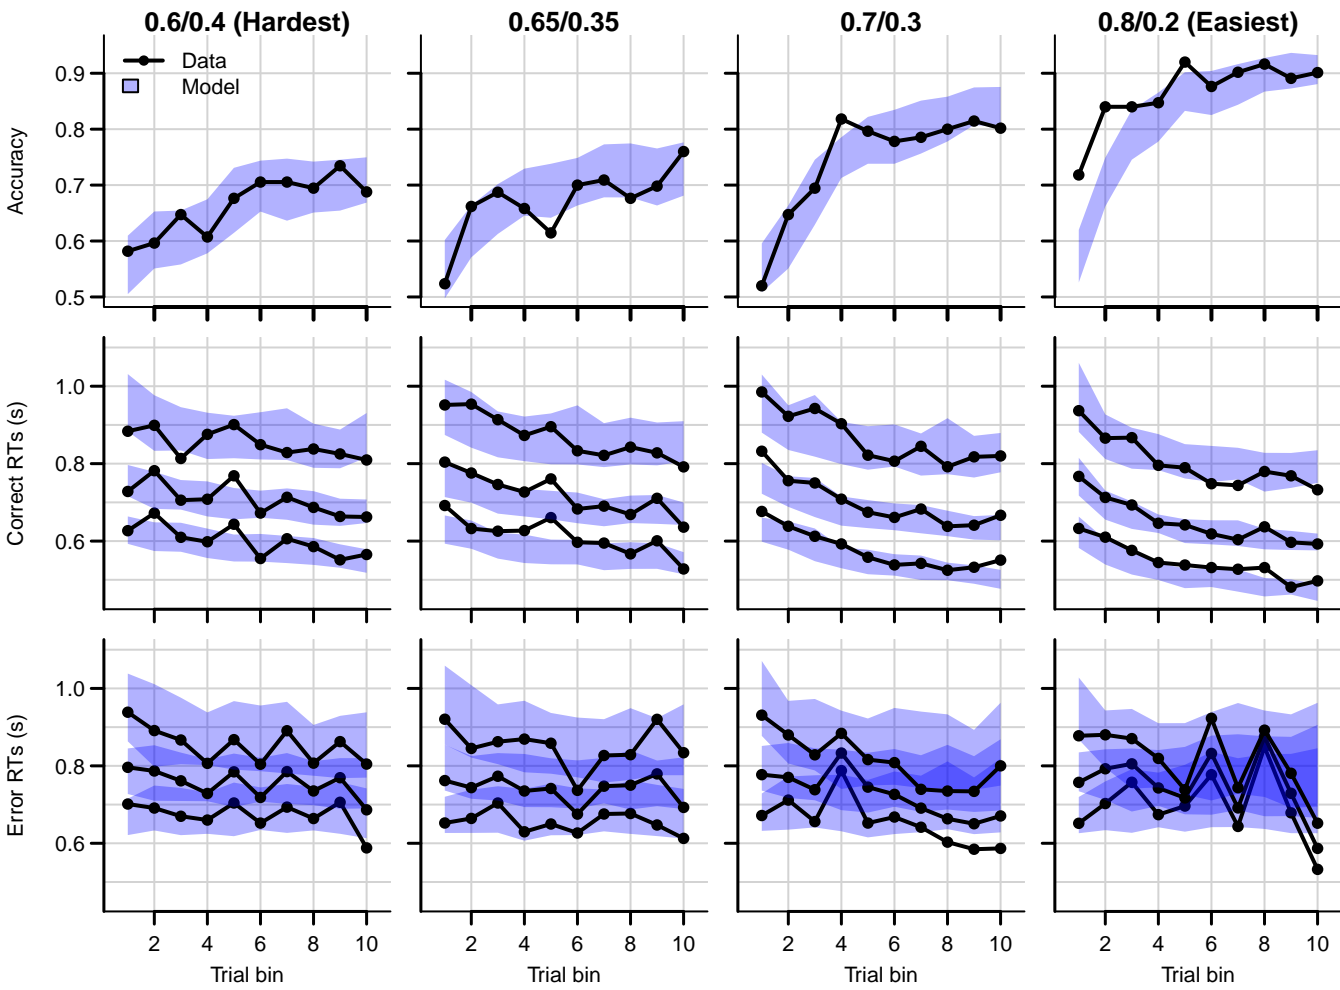

Supplement: supp [file elife-63055-supp-v1.zip › elife_poa_e63055_Figure_4_figure_supplement_3.pdf]

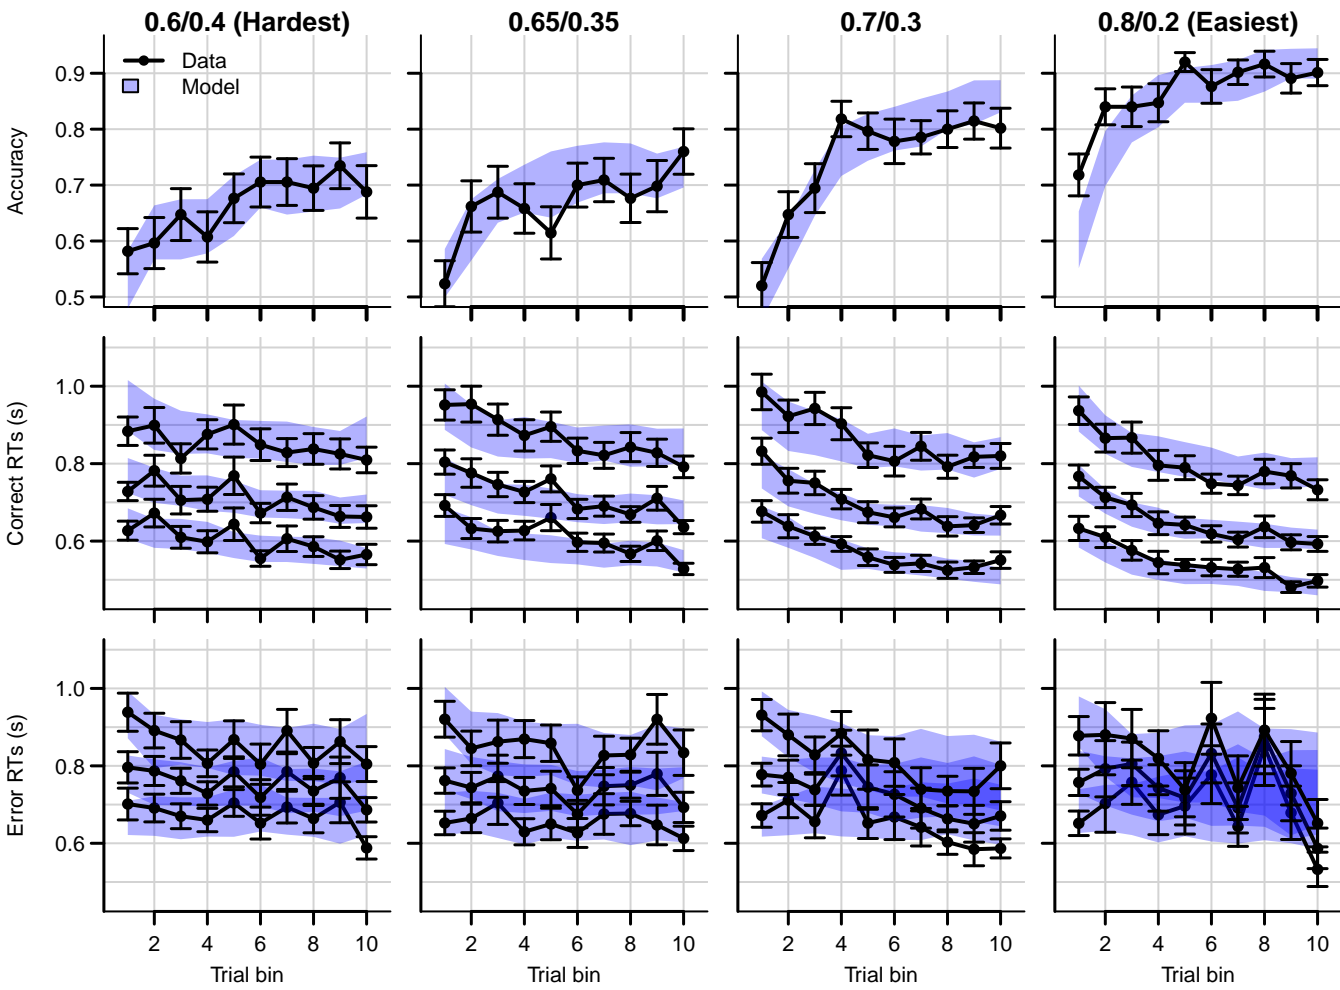

Supplement: supp [file elife-63055-supp-v1.zip › elife_poa_e63055_Figure_4_figure_supplement_4.pdf]

# RL-DDM A3

BPIC = -862

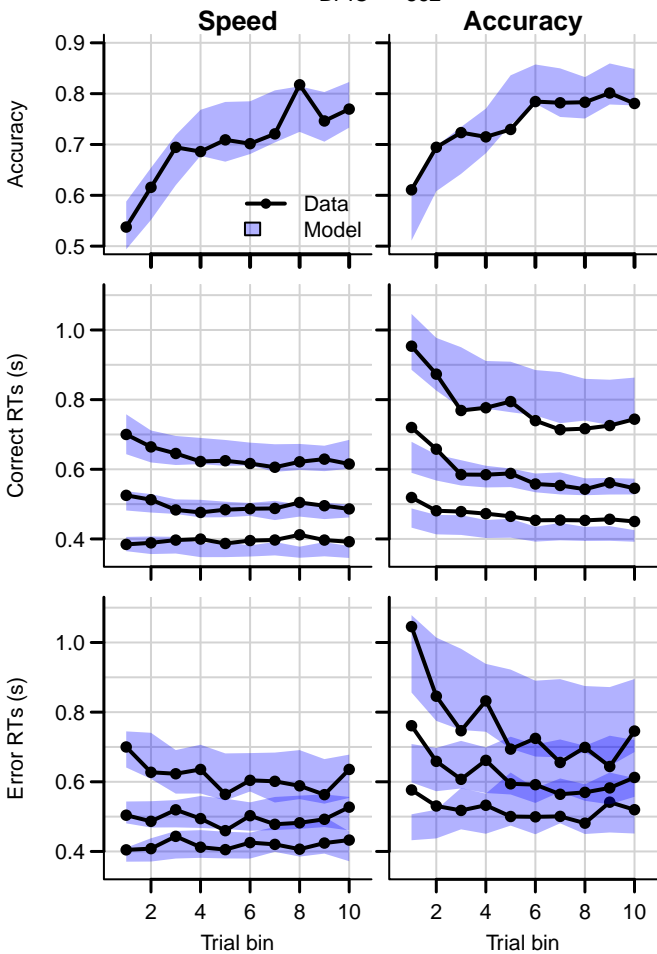

Supplement: supp [file elife-63055-supp-v1.zip › elife_poa_e63055_Figure_6_figure_supplement_1.pdf]

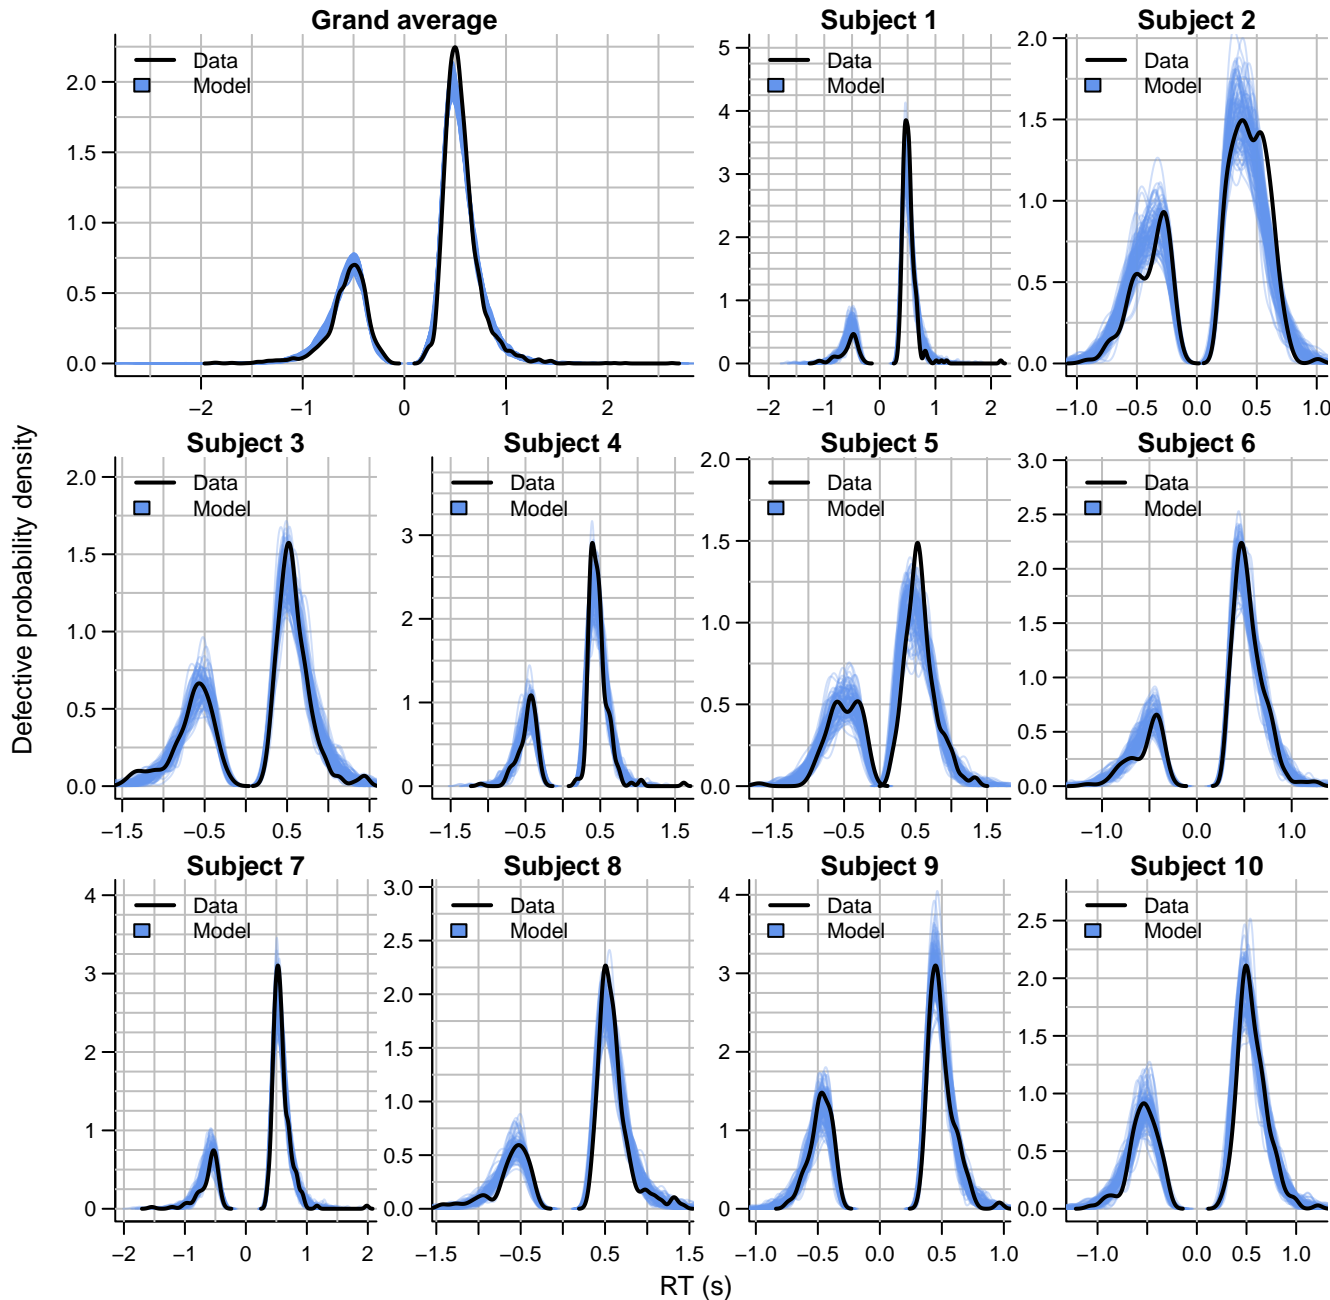

Supplement: supp [file elife-63055-supp-v1.zip › elife_poa_e63055_Figure_6_figure_supplement_4.pdf]

## Soft-max

### Choices by bin

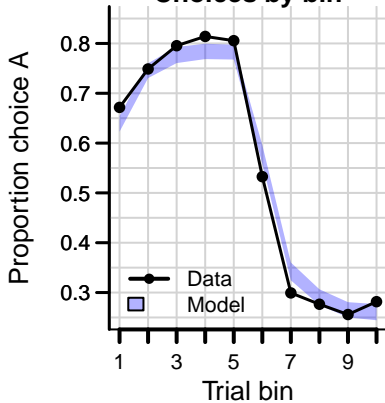

### Choices by trial

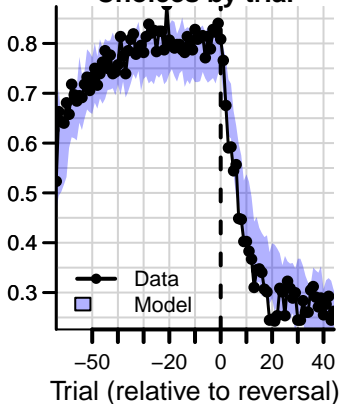

Supplement: supp [file elife-63055-supp-v1.zip › elife_poa_e63055_Figure_7_figure_supplement_1.pdf]

# RL-DDM A3

BPIC = 11659

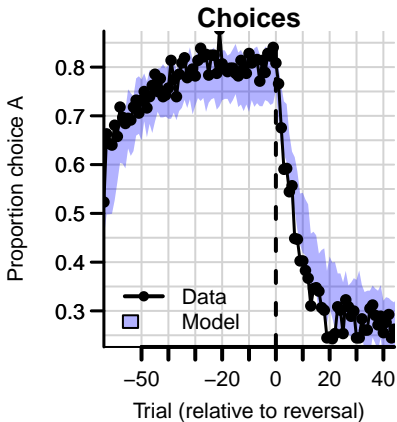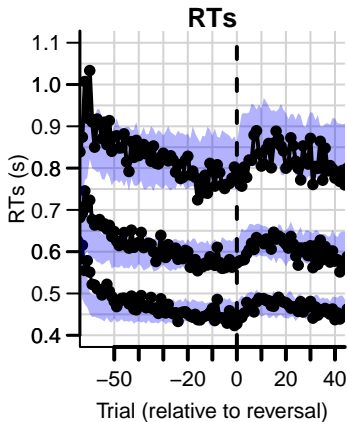

Supplement: supp [file elife-63055-supp-v1.zip › elife_poa_e63055_Figure_7_figure_supplement_2.pdf]

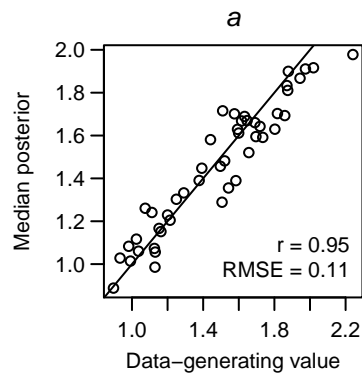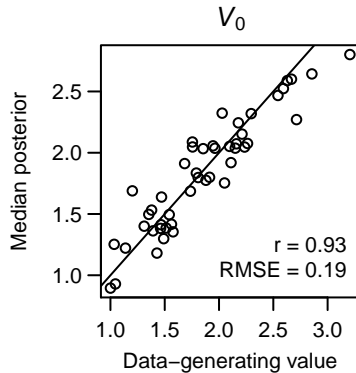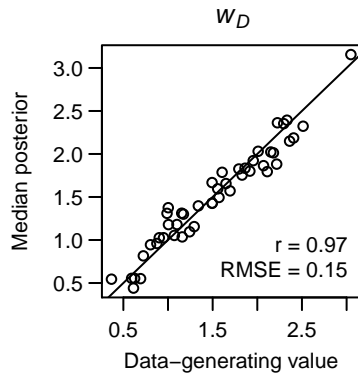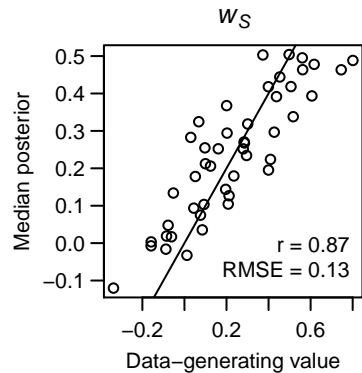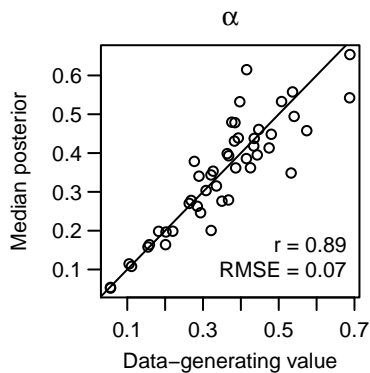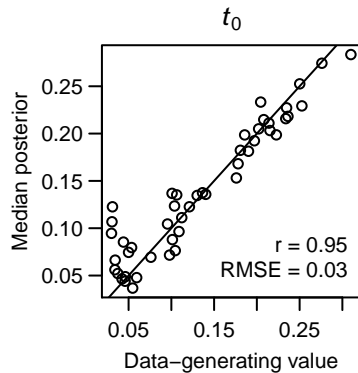

Supplement: supp [file elife-63055-supp-v1.zip]
